# Supplementary material for: BMPER alleviates ischemic brain injury by protecting neurons and inhibiting neuroinflammation via Smad3‐Akt‐Nrf2 pathway
Source: PubMed Central journal article supplement (PMC8928915; doi:10.1111/cns.13782), 2021-12-14

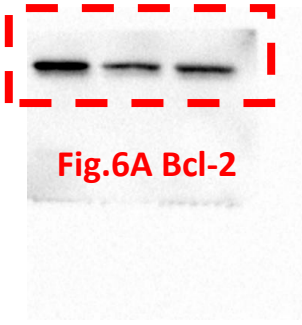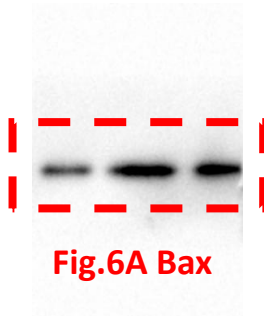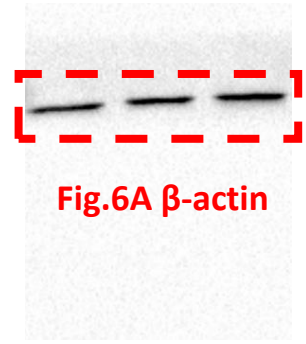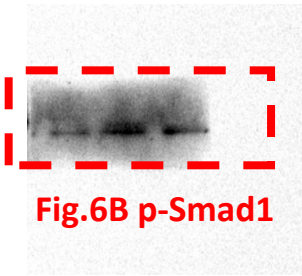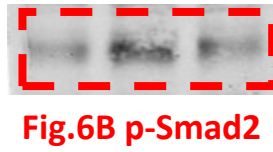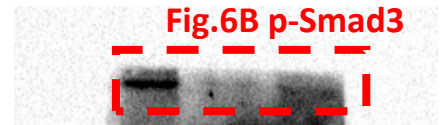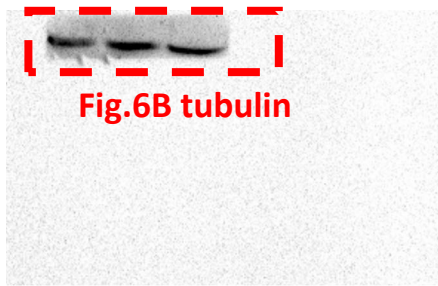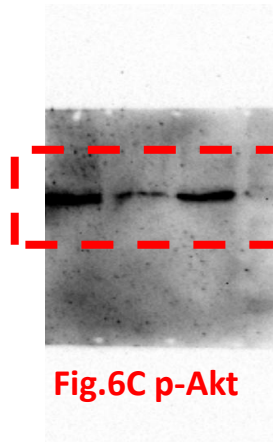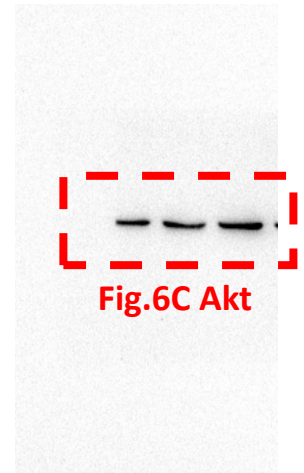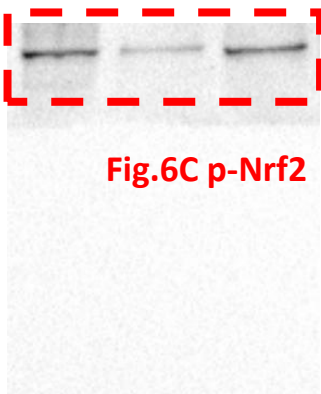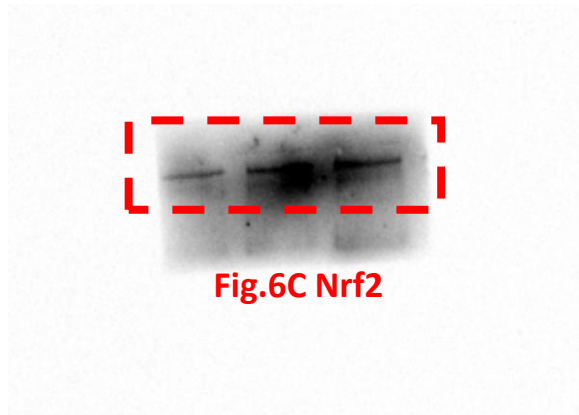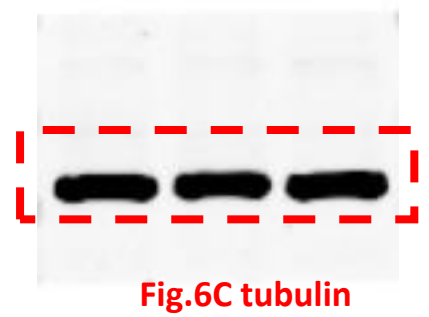

Supplement: CNS-28-593-s001.pdf [file CNS-28-593-s001.pdf]
